# Supplementary material for: Genetic variations of DNA bindings of FOXA1 and co-factors in breast cancer susceptibility
Source: PubMed Central journal article supplement (PMC8438084; doi:10.1038/s41467-021-25670-9), 2021-09-13
Supplement: 41467_2021_25670_MOESM1_ESM.pdf [file 41467_2021_25670_MOESM1_ESM.pdf]

## **Genetic variations of DNA bindings of FOXA1 and co-factors in breast cancer susceptibility**

Wanqing Wen<sup>1\*</sup>, Zhishan Chen<sup>1</sup>, Jiandong Bao<sup>2</sup>, Quan Long<sup>3</sup>, Xiao-ou Shu<sup>1</sup>, Wei Zheng<sup>1</sup>, Xingyi Guo<sup>1,4\*</sup>

<sup>1</sup> Division of Epidemiology, Department of Medicine, & <sup>4</sup> Department of Biomedical Informatics, Vanderbilt Epidemiology Center, Vanderbilt-Ingram Cancer Center, Vanderbilt University Medical Center, Nashville TN, 37203, USA.

<sup>2</sup> College of Life Sciences, Fujian Agriculture and Forestry University, Fuzhou 350002, Fujian, China.

<sup>3</sup> Department of Biochemistry and Molecular Biology & Medical Genetics, & Department of Mathematics and Statistics (Adjunct) Member, Alberta Children's Hospital Research Institute, Hotchkiss Brain Institute, O'Brien Institute for Public Health, Calgary, Canada.

\* Corresponding author contact information:

Dr. Wanqing Wen  
Division of Epidemiology, Department of Medicine  
Vanderbilt Epidemiology Center  
Vanderbilt University School of Medicine  
2525 West End Ave. Suite 600  
Nashville, TN 37203  
Tel: +1 615-936-0747; Fax: +1 615-332-0502  
Email: [wanqing.wen@vumc.org](mailto:wanqing.wen@vumc.org);

Dr. Xingyi Guo  
Division of Epidemiology, Department of Medicine  
Vanderbilt Epidemiology Center, and Vanderbilt-Ingram Cancer Center,  
Vanderbilt University School of Medicine  
2525 West End Ave. Suite 330  
Nashville, TN 37203  
Tel: +1 615-936-3471; Fax: +1 615-332-0502  
Email: [xingyi.guo@vumc.org](mailto:xingyi.guo@vumc.org)

## Supplementary Note

Supplementary Figure 1: Barplot showing the significance of partitioned heritability for a total of 40 TFs based on LD score regression.

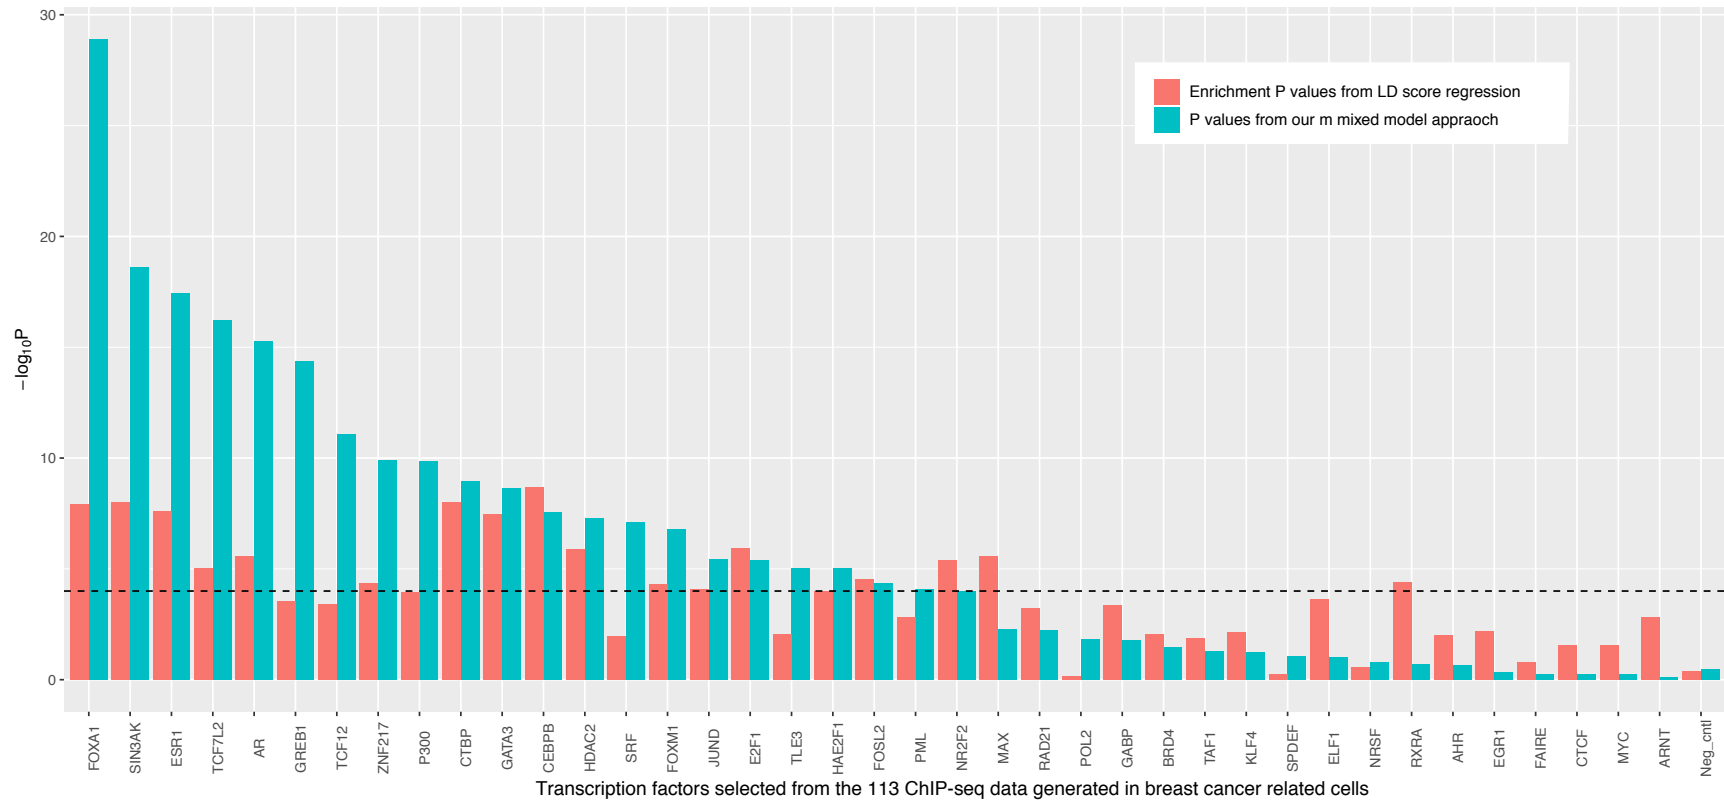

## Supplementary Tables

**Supplementary Table 1: Identified 22 TFs associated with breast cancer risk in BCAC data, at Bonferroni-correction  $P < 0.05$ .**

| TF     | Association with breast cancer risk |        |          |                 |        |          | Number and percentage of TF-occupied SNPs |       |                |        |                        |       |
|--------|-------------------------------------|--------|----------|-----------------|--------|----------|-------------------------------------------|-------|----------------|--------|------------------------|-------|
|        | Whole genome                        |        |          | Deflated genome |        |          | Whole genome                              |       | 148 GWAS loci† |        | GWAS significant SNPs‡ |       |
|        | N=11337849                          |        |          | N=10139064      |        |          | N=11337849                                |       | N=606728       |        | N=20887                |       |
|        | beta*                               | se     | p        | beta*           | se     | p        | N§                                        | %     | N §            | %      | N§                     | %     |
| FOXA1  | 0.1261                              | 0.0112 | 1.25E-29 | 0.0155          | 0.0039 | 6.25E-05 | 150264                                    | 1.33% | 11768          | 1.94%  | 688                    | 3.29% |
| SIN3AK | 0.0793                              | 0.0088 | 2.57E-19 | 0.0068          | 0.0031 | 2.56E-02 | 247692                                    | 2.18% | 20157          | 3.32%  | 844                    | 4.04% |
| ESR1   | 0.0835                              | 0.0096 | 3.66E-18 | 0.0092          | 0.0033 | 5.64E-03 | 203956                                    | 1.80% | 16267          | 2.68%  | 698                    | 3.34% |
| TCF7L2 | 0.1411                              | 0.0169 | 5.85E-17 | 0.0345          | 0.0059 | 3.86E-09 | 64782                                     | 0.57% | 19305          | 3.18%  | 254                    | 1.22% |
| AR     | 0.0791                              | 0.0098 | 5.58E-16 | 0.0115          | 0.0034 | 7.14E-04 | 199259                                    | 1.76% | 15944          | 2.63%  | 847                    | 4.06% |
| GREB1  | 0.1124                              | 0.0143 | 4.18E-15 | 0.0178          | 0.0050 | 3.23E-04 | 90774                                     | 0.80% | 14903          | 2.46%  | 296                    | 1.42% |
| TCF12  | 0.1027                              | 0.0150 | 8.44E-12 | 0.0129          | 0.0052 | 1.31E-02 | 82188                                     | 0.72% | 9805           | 1.62%  | 321                    | 1.54% |
| ZNF217 | 0.1390                              | 0.0216 | 1.30E-10 | 0.0236          | 0.0075 | 1.73E-03 | 40559                                     | 0.36% | 7084           | 1.17%  | 156                    | 0.75% |
| P300   | 0.1174                              | 0.0183 | 1.45E-10 | 0.0088          | 0.0064 | 1.65E-01 | 55087                                     | 0.49% | 14341          | 2.36%  | 246                    | 1.18% |
| CTBP   | 0.0694                              | 0.0114 | 1.16E-09 | 0.0115          | 0.0040 | 3.55E-03 | 144834                                    | 1.28% | 11630          | 1.92%  | 488                    | 2.34% |
| GATA3  | 0.0526                              | 0.0088 | 2.33E-09 | 0.0085          | 0.0030 | 5.08E-03 | 243784                                    | 2.15% | 18958          | 3.12%  | 803                    | 3.84% |
| CEBPB  | 0.0540                              | 0.0097 | 2.86E-08 | 0.0076          | 0.0034 | 2.46E-02 | 197109                                    | 1.74% | 15744          | 2.59%  | 633                    | 3.03% |
| HDAC2  | 0.0552                              | 0.0101 | 5.18E-08 | 0.0083          | 0.0035 | 1.79E-02 | 184029                                    | 1.62% | 15826          | 2.61%  | 615                    | 2.94% |
| SRF    | 0.0700                              | 0.0130 | 7.98E-08 | 0.0072          | 0.0045 | 1.12E-01 | 109279                                    | 0.96% | 11215          | 1.85%  | 318                    | 1.52% |
| FOXM1  | 0.0854                              | 0.0163 | 1.57E-07 | 0.0146          | 0.0057 | 9.97E-03 | 69833                                     | 0.62% | 8725           | 1.44%  | 257                    | 1.23% |
| JUND   | 0.0633                              | 0.0137 | 3.67E-06 | 0.0138          | 0.0047 | 3.55E-03 | 100229                                    | 0.88% | 11836          | 1.95%  | 299                    | 1.43% |
| E2F1   | 0.0337                              | 0.0073 | 4.13E-06 | -0.0036         | 0.0025 | 1.58E-01 | 375051                                    | 3.31% | 28249          | 4.66%  | 875                    | 4.19% |
| TLE3   | 0.0484                              | 0.0109 | 9.41E-06 | 0.0075          | 0.0038 | 4.77E-02 | 157002                                    | 1.38% | 11238          | 1.85%  | 344                    | 1.65% |
| HAE2F1 | 0.0402                              | 0.0091 | 9.58E-06 | 0.0027          | 0.0031 | 3.85E-01 | 234249                                    | 2.07% | 18309          | 3.02%  | 674                    | 3.23% |
| FOSL2  | 0.0539                              | 0.0132 | 4.31E-05 | -0.0001         | 0.0046 | 9.83E-01 | 106473                                    | 0.94% | 9392           | 1.55%  | 371                    | 1.78% |
| PML    | 0.0714                              | 0.0181 | 8.36E-05 | 0.0145          | 0.0063 | 2.14E-02 | 56420                                     | 0.50% | 20590          | 3.39%  | 155                    | 0.74% |
| NR2F2  | 0.0220                              | 0.0057 | 1.00E-04 | 0.0052          | 0.0020 | 7.47E-03 | 749498                                    | 6.61% | 62141          | 10.24% | 1624                   | 7.78% |

\* The mean difference of the Chi-square values between SNPs with and without the TF occupancy

† A total of 148 loci were defined in the BCAC data, which include GWAS-identified SNPs and the flanking regions (+/-500Kb). These 148 loci include 606,728 SNPs.

‡ A total of 20,887 SNPs were GWAS-significant with the reported p-value < 5E-8 in the BCAC data.

§ The number of SNPs occupied by the TF

|| The percentage of the number of SNPs occupied by the TF over the total number of SNPs

**Supplementary Table 2: Genetic variations of TF-DNA binding of TFs associated with breast cancer risk in BCAC data, stratified by motifs (i.e. host, non-host and no motif).**

| TF     | Number of SNPs occupied by TF |          |          | Host motif |        |          | Non-host motif |        |          | No motif |        |          |
|--------|-------------------------------|----------|----------|------------|--------|----------|----------------|--------|----------|----------|--------|----------|
|        | Host                          | Non-host | No motif | beta*      | se     | p        | beta*          | se     | p        | beta*    | se     | p        |
| AR     | 46608                         | 47107    | 105544   | 0.0882     | 0.0198 | 8.08E-06 | 0.0755         | 0.0197 | 1.25E-04 | 0.0766   | 0.0133 | 8.48E-09 |
| CEBPB  | 79736                         | 53038    | 64335    | 0.0400     | 0.0151 | 8.11E-03 | 0.0759         | 0.0185 | 4.20E-05 | 0.0535   | 0.0169 | 1.55E-03 |
| E2F1   | 9382                          | 73548    | 292121   | -0.0546    | 0.0439 | 2.14E-01 | 0.0944         | 0.0158 | 2.41E-09 | 0.0211   | 0.0082 | 1.01E-02 |
| ESR1   | 10416                         | 107877   | 85663    | 0.1805     | 0.0416 | 1.47E-05 | 0.0889         | 0.0131 | 1.01E-11 | 0.0648   | 0.0147 | 1.00E-05 |
| FOSL2  | 25490                         | 43955    | 37028    | -0.0135    | 0.0266 | 6.12E-01 | 0.0896         | 0.0204 | 1.09E-05 | 0.0584   | 0.0222 | 8.59E-03 |
| FOXA1  | 50154                         | 42988    | 57122    | 0.1368     | 0.0190 | 6.77E-13 | 0.1664         | 0.0206 | 6.47E-16 | 0.0861   | 0.0179 | 1.57E-06 |
| FOXM1  | 4506                          | 31192    | 34135    | 0.3908     | 0.0633 | 6.66E-10 | 0.0689         | 0.0242 | 4.40E-03 | 0.0598   | 0.0232 | 9.87E-03 |
| GATA3  | 65373                         | 90060    | 88351    | 0.0547     | 0.0167 | 1.05E-03 | 0.0376         | 0.0143 | 8.38E-03 | 0.0663   | 0.0145 | 4.48E-06 |
| JUND   | 354                           | 44417    | 55458    | -0.2750    | 0.2257 | 2.23E-01 | 0.0561         | 0.0203 | 5.70E-03 | 0.0713   | 0.0183 | 9.60E-05 |
| NR2F2  | 104317                        | 112983   | 532198   | 0.0061     | 0.0133 | 6.47E-01 | 0.0543         | 0.0128 | 2.30E-05 | 0.0178   | 0.0066 | 7.00E-03 |
| SRF    | 4416                          | 53272    | 51591    | 0.0247     | 0.0639 | 6.99E-01 | 0.0873         | 0.0185 | 2.43E-06 | 0.0560   | 0.0189 | 3.00E-03 |
| TCF12  | 6215                          | 39713    | 36260    | 0.0897     | 0.0539 | 9.63E-02 | 0.1164         | 0.0214 | 5.71E-08 | 0.0898   | 0.0225 | 6.53E-05 |
| TCF7L2 | 4677                          | 30847    | 29258    | 0.1895     | 0.0621 | 2.29E-03 | 0.1674         | 0.0243 | 5.54E-12 | 0.1056   | 0.0249 | 2.33E-05 |
| CTBP   |                               | 93687    | 51147    |            |        |          | 0.0735         | 0.0140 | 1.56E-07 | 0.0616   | 0.0192 | 1.30E-03 |
| GREB1  |                               | 48625    | 42149    |            |        |          | 0.1574         | 0.0194 | 4.84E-16 | 0.0601   | 0.0209 | 4.04E-03 |
| HAE2F1 |                               | 65818    | 168431   |            |        |          | 0.0838         | 0.0167 | 5.37E-07 | 0.0231   | 0.0106 | 2.94E-02 |
| HDAC2  |                               | 83322    | 100707   |            |        |          | 0.0736         | 0.0149 | 7.24E-07 | 0.0399   | 0.0136 | 3.32E-03 |
| P300   |                               | 31757    | 23330    |            |        |          | 0.1441         | 0.0240 | 1.86E-09 | 0.0810   | 0.0280 | 3.82E-03 |
| PML    |                               | 21807    | 34613    |            |        |          | 0.0499         | 0.0289 | 8.47E-02 | 0.0849   | 0.0231 | 2.28E-04 |
| SIN3AK |                               | 108795   | 138897   |            |        |          | 0.0839         | 0.0130 | 1.26E-10 | 0.0756   | 0.0116 | 8.28E-11 |
| TLE3   |                               | 39867    | 117135   |            |        |          | 0.1195         | 0.0214 | 2.29E-08 | 0.0241   | 0.0126 | 5.61E-02 |
| ZNF217 |                               | 24635    | 15924    |            |        |          | 0.1912         | 0.0272 | 1.99E-12 | 0.0510   | 0.0352 | 1.47E-01 |

\* The mean difference of the Chi-square values between SNPs with and without the TF occupancy

**Supplementary Table 3: Association of co-occupancy of three TFs with breast cancer risk in BCAC data, stratified by FOXA1.**

| TF       |           |          | Number of SNPs occupied by TF |                 |                 | Both 2nd and 3rd TF |        |          | Only second TF |        |          | Only Third TF |        |          | P for interaction with FOXA1 |
|----------|-----------|----------|-------------------------------|-----------------|-----------------|---------------------|--------|----------|----------------|--------|----------|---------------|--------|----------|------------------------------|
| First TF | Second TF |          | Both 2nd/3rd TF               | The 2nd TF only | The 3rd TF only | beta*               | se     | p        | beta*          | se     | p        | beta*         | se     | p        |                              |
|          | TF        | Third TF |                               |                 |                 |                     |        |          |                |        |          |               |        |          |                              |
| FOXA1=0  | ESR1      | E2F1     | 25401                         | 117378          | 329246          | 0.0654              | 0.0269 | 1.50E-01 | 0.0037         | 0.0126 | 7.70E-01 | 0.0078        | 0.0078 | 3.14E-01 |                              |
| FOXA1=1  | ESR1      | E2F1     | 13612                         | 47565           | 6792            | 0.4665              | 0.0395 | 3.86E-32 | 0.1632         | 0.0245 | 2.85E-11 | 0.3194        | 0.0538 | 2.87E-09 | 1.80E-18                     |
| FOXA1=0  | ESR1      | TCF12V   | 20400                         | 122379          | 41303           | 0.0930              | 0.0299 | 1.88E-03 | 0.0008         | 0.0123 | 9.47E-01 | -0.0146       | 0.0211 | 4.88E-01 |                              |
| FOXA1=1  | ESR1      | TCF12V   | 18159                         | 43018           | 2326            | 0.3244              | 0.0348 | 1.14E-20 | 0.1667         | 0.0251 | 3.18E-11 | 0.2921        | 0.0894 | 1.08E-03 | 6.85E-13                     |
| FOXA1=0  | TCF12V    | TLE3     | 8625                          | 53078           | 126618          | 0.0970              | 0.0459 | 3.47E-02 | 0.0086         | 0.0186 | 6.44E-01 | 0.0074        | 0.0122 | 5.43E-01 |                              |
| FOXA1=1  | TCF12V    | TLE3     | 9806                          | 10679           | 11953           | 0.3777              | 0.0448 | 3.37E-17 | 0.1679         | 0.0431 | 9.66E-05 | 0.0346        | 0.0409 | 3.97E-01 | 1.93E-06                     |
| FOXA1=0  | SIN3AK    | TLE3     | 19043                         | 179925          | 116200          | 0.0818              | 0.0309 | 8.24E-03 | 0.0280         | 0.0103 | 6.45E-03 | 0.0025        | 0.0127 | 8.44E-01 |                              |
| FOXA1=1  | SIN3AK    | TLE3     | 16813                         | 31911           | 4946            | 0.2879              | 0.0356 | 6.37E-16 | 0.1694         | 0.0275 | 7.46E-10 | -0.0211       | 0.0621 | 7.35E-01 | 2.30E-08                     |

\* The mean difference of the Chi-square values between SNPs with and without the TF occupancy

**Supplementary Table 4: Association of number of occupied TFs with breast cancer risk in BCAC data.**

| TF score                                    | Number of SNPs occupied by TFs | beta*     | se     | p        |
|---------------------------------------------|--------------------------------|-----------|--------|----------|
| <b>All 22 TFs combined</b>                  |                                |           |        |          |
| 0 TF                                        | 9538718                        | Reference |        |          |
| 1-2 TFs                                     | 1450531                        | 0.0145    | 0.0040 | 3.15E-04 |
| 3-5 TFs                                     | 196996                         | 0.0468    | 0.0098 | 1.87E-06 |
| 4-10 TFs                                    | 104834                         | 0.1129    | 0.0133 | 2.61E-17 |
| 11-22 TFs                                   | 46770                          | 0.1427    | 0.0199 | 7.02E-13 |
| <b>Score of 21 TFs, stratified by FOXA1</b> |                                |           |        |          |
| FOXA1=0                                     |                                |           |        |          |
| 0 TF                                        | 9538718                        | Reference |        |          |
| 1-2 TFs                                     | 1380718                        | 0.0143    | 0.0041 | 5.03E-04 |
| 3-5 TFs                                     | 163926                         | 0.0297    | 0.0107 | 5.73E-03 |
| 4-10 TFs                                    | 78869                          | 0.0450    | 0.0153 | 3.35E-03 |
| 11-21 TFs                                   | 25254                          | 0.0066    | 0.0269 | 8.07E-01 |
| FOXA1=1                                     |                                |           |        |          |
| 0 TF                                        | 45441                          | Reference |        |          |
| 1-2 TFs                                     | 38969                          | 0.0101    | 0.0641 | 8.75E-01 |
| 3-5 TFs                                     | 25128                          | 0.2334    | 0.0789 | 3.10E-03 |
| 4-10 TFs                                    | 22675                          | 0.2201    | 0.0790 | 5.30E-03 |
| 11-21 TFs                                   | 18051                          | 0.3165    | 0.0873 | 2.90E-04 |
| P for interaction with FOXA1 = 1.23E-18     |                                |           |        |          |

\* The mean difference of the Chi-square values between SNPs with and without the TF occupancy
