# Supplementary material for: Genetic variations of DNA bindings of FOXA1 and co-factors in breast cancer susceptibility
Source: PubMed Central journal article supplement (PMC8438084; doi:10.1038/s41467-021-25670-9), 2021-09-13
Supplement: 41467_2021_25670_MOESM2_ESM.pdf [file 41467_2021_25670_MOESM2_ESM.pdf]

### **Description of Additional Supplementary Files**

File Name: Supplementary Data 1

Description: A total of 113 CHIP-seq data generated in breast cancer cell lines collected from ENCODE and previous literature.

File Name: Supplementary Data 2

Description: Association of co-occupancy of two TFs with breast cancer risk in BCAC data.

File Name: Supplementary Data 3

Description: : Association of chromatin states with breast cancer risk and interaction with TF score in BCAC data.

File Name: Supplementary Data 4

Description: Breast cancer susceptibility genes identified by TWAS analysis using genetic variants occupied by risk-associated TFs.

File Name: Supplementary Data 5

Description: Susceptibility genes supported by functional genomic data analysis.
